# Supplementary material for: Betel-Quid Chewing, Heart Failure, and Premature Ventricular Contractions in Patients with Cardiopulmonary Symptoms
Source: PubMed Central journal article supplement (PMC7602392; doi:10.3390/ijerph17207472), 2020-10-14
Supplement: ijerph-17-07472-s001.pdf [file ijerph-17-07472-s001.pdf]

**Supplement Table S1.** Electrocardiographic characteristics associated with betel-quid use among Holter monitor patients <sup>1</sup>.

| <b>Parameters</b> | <b>BQ users (<i>n</i> = 29)<br/>(mean ± SD)</b> | <b>BQ nonusers (<i>n</i> = 45)<br/>(mean ± SD)</b> | <b><i>p</i> value</b> |
|-------------------|-------------------------------------------------|----------------------------------------------------|-----------------------|
| LA (cm)           | 3.89 ± 0.91                                     | 3.92 ± 1.03                                        | 0.890                 |
| LVIDd (cm)        | 4.89 ± 0.96                                     | 5.13 ± 0.62                                        | 0.205                 |
| IVSd (cm)         | 1.44 ± 1.67                                     | 1.27 ± 1.39                                        | 0.655                 |
| LVPWd (cm)        | 1.09 ± 0.36                                     | 1.29 ± 1.38                                        | 0.454                 |
| EF (%)            | 65.46 ± 14.44                                   | 64.80 ± 11.44                                      | 0.828                 |

LA, left atrium diameter; LVIDd, left ventricular internal diameter in end-diastole; IVSd, interventricular septum thickness in end-diastole; LVPWd, left ventricular posterior wall thickness in end-diastole; EF, ejection fraction of left ventricle; SD, standard deviation. <sup>1</sup>Only 76 patents were measured for these electrocardiographic parameters.

**Supplement Table S2.** Parameters of heart rate variability associated with betel-quin use among Holter monitor patients<sup>1</sup>.

| Parameters           | BQ users ( <i>n</i> = 31) |              | BQ nonusers ( <i>n</i> = 48) |              | <i>p</i> value |
|----------------------|---------------------------|--------------|------------------------------|--------------|----------------|
|                      | Median                    | Q1–Q3        | Median                       | Q1–Q3        |                |
| SDNN, ms             | 117.60                    | 81.79–165.28 | 130.51                       | 97.05–161.33 | 0.520          |
| RMSSD, ms            | 23.31                     | 14.77–60.21  | 26.82                        | 16.14–41.94  | 0.968          |
| NN50, ms             | 3286                      | 731–13972    | 3493                         | 882–11165    | 0.920          |
| pNN50, %             | 3.08                      | 0.70–12.28   | 4.17                         | 0.91–10.66   | 0.790          |
| VLF, ms <sup>2</sup> | 3095                      | 1972–4812    | 2777                         | 2009–3747    | 0.366          |
| LF, ms <sup>2</sup>  | 3576                      | 2009–7801    | 2167                         | 1416–4369    | 0.100          |
| HF, ms <sup>2</sup>  | 1643                      | 638–4596     | 1003                         | 595–2150     | 0.148          |
| Normalized LF, %     | 69.91                     | 55.69–75.59  | 68.93                        | 60.93–74.72  | 0.810          |
| Normalized HF, %     | 30.10                     | 24.41–44.31  | 31.07                        | 25.38–39.07  | 0.810          |
| LF/HF                | 2.32                      | 1.26–3.10    | 2.22                         | 1.56–2.94    | 0.810          |

HF, high frequency; LF, low frequency; NN50, the number of pairs of successive NNs that differ by more than 50 ms; pNN50, the proportion of NN50 divided by total number of NNs; Q1, 25th percentile; Q3, 75th percentile; RMSSD, root mean square of successive differences; SDNN, the standard deviation of NN intervals; VLF, very low frequency. <sup>1</sup>Only 79 patients were measured for these heart rate variability parameters.
